# Supplementary material for: N-(Aryl)pyrrole-2-aldimine complexes of ruthenium: synthesis, structure, and spectral and electrochemical properties
Source: Royal Society of Chemistry journal article supplement (doi:10.1039/d2nj05295d), 2023-01-01
Supplement: d2nj05295d1.pdf [file d2nj05295d1.pdf]

**†Electronic supplementary information (ESI)**

**N-(aryl)pyrrole-2-alimine complexes of ruthenium: Synthesis,  
structure and, spectral and electrochemical properties†**

Anushri Chandra,<sup>a</sup> Papu Dhibar,<sup>a</sup> Pragna Dutta,<sup>a</sup> Piyali Paul<sup>b</sup> and Samaresh  
Bhattacharya\*<sup>a</sup>

<sup>a</sup> *Department of Chemistry, Inorganic Chemistry Section, Jadavpur University,  
Kolkata - 700 032, India. E-mail: samareshb.chemistry@jadavpuruniversity.in*

<sup>b</sup> *Department of Chemistry and Environment, Heritage Institute of Technology,  
Kolkata-700 107, India*

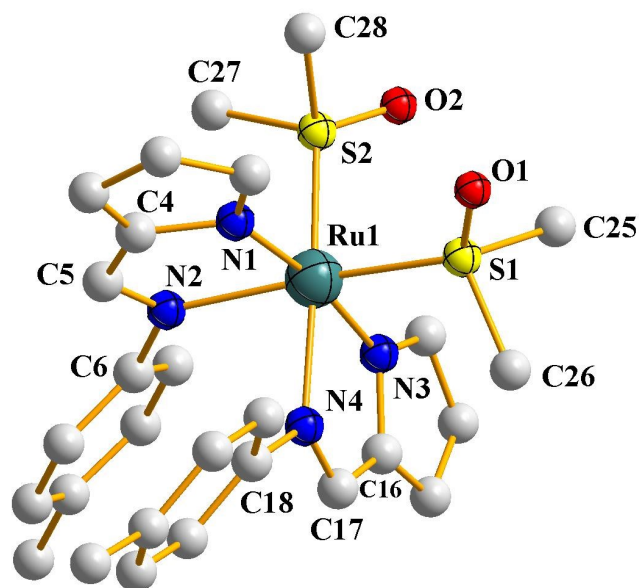

**Fig. S1.** Crystal structure of the  $[\text{Ru}(\text{L-CH}_3)_2(\text{dmsol})_2]$  complex.

**Table S1.** Selected bond distances and bond angles for  $[\text{Ru}(\text{L-CH}_3)_2(\text{dmsol})_2]$ .

| Bond distances (Å) |            |           |          |
|--------------------|------------|-----------|----------|
| Ru1-N1             | 2.0774(19) | N3-C16    | 1.385(3) |
| Ru1-N2             | 2.1576(18) | C16-C17   | 1.408(3) |
| Ru1-N3             | 2.0812(19) | N4-C17    | 1.308(3) |
| Ru1-N4             | 2.1422(18) | N4-C18    | 1.421(3) |
| Ru1-S1             | 2.2492(6)  | S1-O1     | 1.474(2) |
| Ru1-S2             | 2.2419(7)  | S1-C25    | 1.781(3) |
| N1-C4              | 1.378(3)   | S1-C26    | 1.784(3) |
| C4-C5              | 1.402(4)   | S2-O2     | 1.467(2) |
| N2-C5              | 1.313(3)   | S2-C27    | 1.778(4) |
| N2-C6              | 1.428(3)   | S2-C28    | 1.778(3) |
| Bond angles (°)    |            |           |          |
| N1-Ru1-N3          | 171.43(8)  | N1-Ru1-N2 | 77.94(8) |
| S1-Ru1-N2          | 171.34(5)  | N3-Ru1-N4 | 78.11(7) |
| S2-Ru1-N4          | 172.62(5)  |           |          |

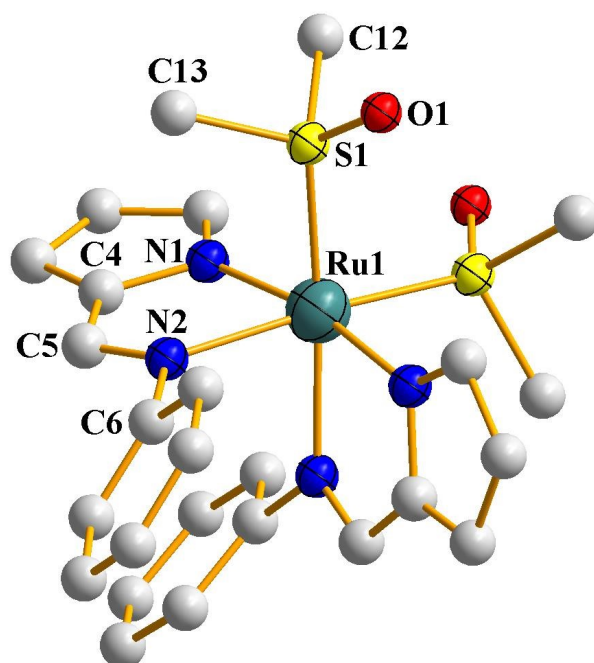

**Fig. S2.** Crystal structure of the  $[\text{Ru}(\text{L-H})_2(\text{dmsO})_2]$  complex.

**Table S2.** Selected bond distances and bond angles for  $[\text{Ru}(\text{L-H})_2(\text{dmsO})_2]$ .

| Bond distances (Å) |            |           |          |
|--------------------|------------|-----------|----------|
| Ru1-N1             | 2.082(2)   | C5-N2     | 1.312(4) |
| Ru1-N2             | 2.148(2)   | C6-N2     | 1.416(4) |
| Ru1-S1             | 2.2459(8)  | S1-O1     | 1.484(2) |
| C4-N1              | 1.387(4)   | C12-S1    | 1.789(4) |
| C4-C5              | 1.406(4)   | C13-S1    | 1.789(3) |
| Bond angles (°)    |            |           |          |
| N1-Ru1-N1a         | 169.21(13) | N1-Ru1-N2 | 78.10(9) |
| S1-Ru1-N2a         | 173.54(7)  |           |          |

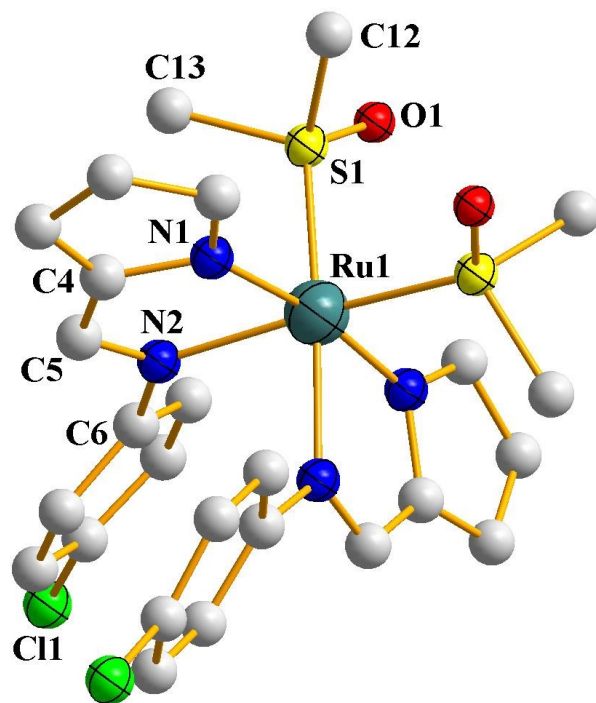

**Fig. S3.** Crystal structure of the  $[\text{Ru}(\text{L-Cl})_2(\text{dmsO})_2]$  complex.

**Table S3.** Selected bond distances and bond angles for  $[\text{Ru}(\text{L-Cl})_2(\text{dmsO})_2]$ .

| Bond distances (Å) |            |           |            |
|--------------------|------------|-----------|------------|
| Ru1-N1             | 2.0806(13) | C5-N2     | 1.309(3)   |
| Ru1-N2             | 2.1415(17) | C6-N2     | 1.422(3)   |
| Ru1-S1             | 2.2504(5)  | S1-O1     | 1.4853(15) |
| C4-N1              | 1.380(2)   | C12-S1    | 1.790(2)   |
| C4-C5              | 1.405(2)   | C13-S1    | 1.782(2)   |
| Bond angles (°)    |            |           |            |
| N1-Ru1-N1a         | 171.30(10) | N1-Ru1-N2 | 77.61(7)   |
| S1-Ru1-N2          | 172.24(5)  |           |            |

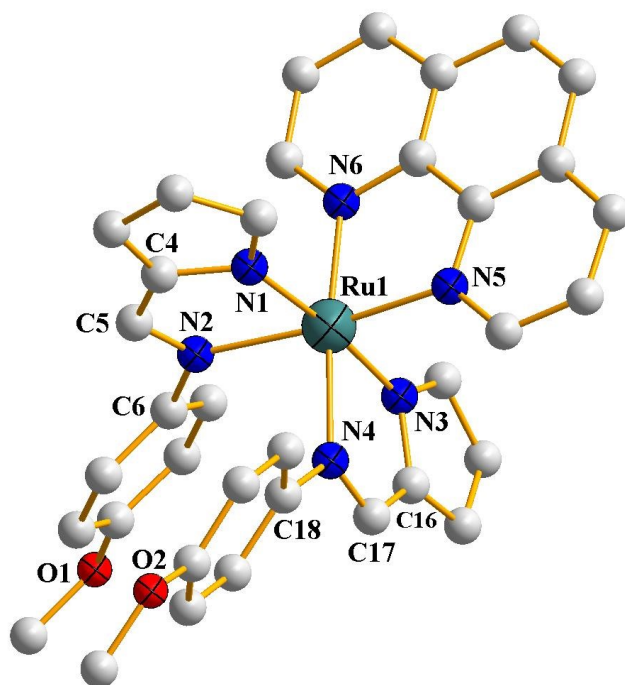

**Fig. S4.** DFT-optimized structure of the  $[\text{Ru}(\text{L-OCH}_3)_2(\text{phen})]$  complex.

**Table S4.** Some computed bond distances and bond angles for  $[\text{Ru}(\text{L-OCH}_3)_2(\text{phen})]$ .

| Bond distances (Å) |        |           |        |
|--------------------|--------|-----------|--------|
| Ru1-N1             | 2.1148 | C4-C5     | 1.4087 |
| Ru1-N2             | 2.1762 | N2-C5     | 1.3190 |
| Ru1-N3             | 2.1148 | N2-C6     | 1.4167 |
| Ru1-N4             | 2.1762 | N3-C16    | 1.3849 |
| Ru1-N5             | 2.0764 | C16-C17   | 1.4087 |
| Ru1-N6             | 2.0764 | N4-C17    | 1.3190 |
| N1-C4              | 1.3849 | N4-C18    | 1.4167 |
| Bond angles (°)    |        |           |        |
| N1-Ru1-N3          | 174.15 | N1-Ru1-N2 | 77.56  |
| N2-Ru1-N5          | 173.18 | N3-Ru1-N4 | 77.56  |
| N4-Ru1-N6          | 173.18 | N5-Ru1-N6 | 79.35  |

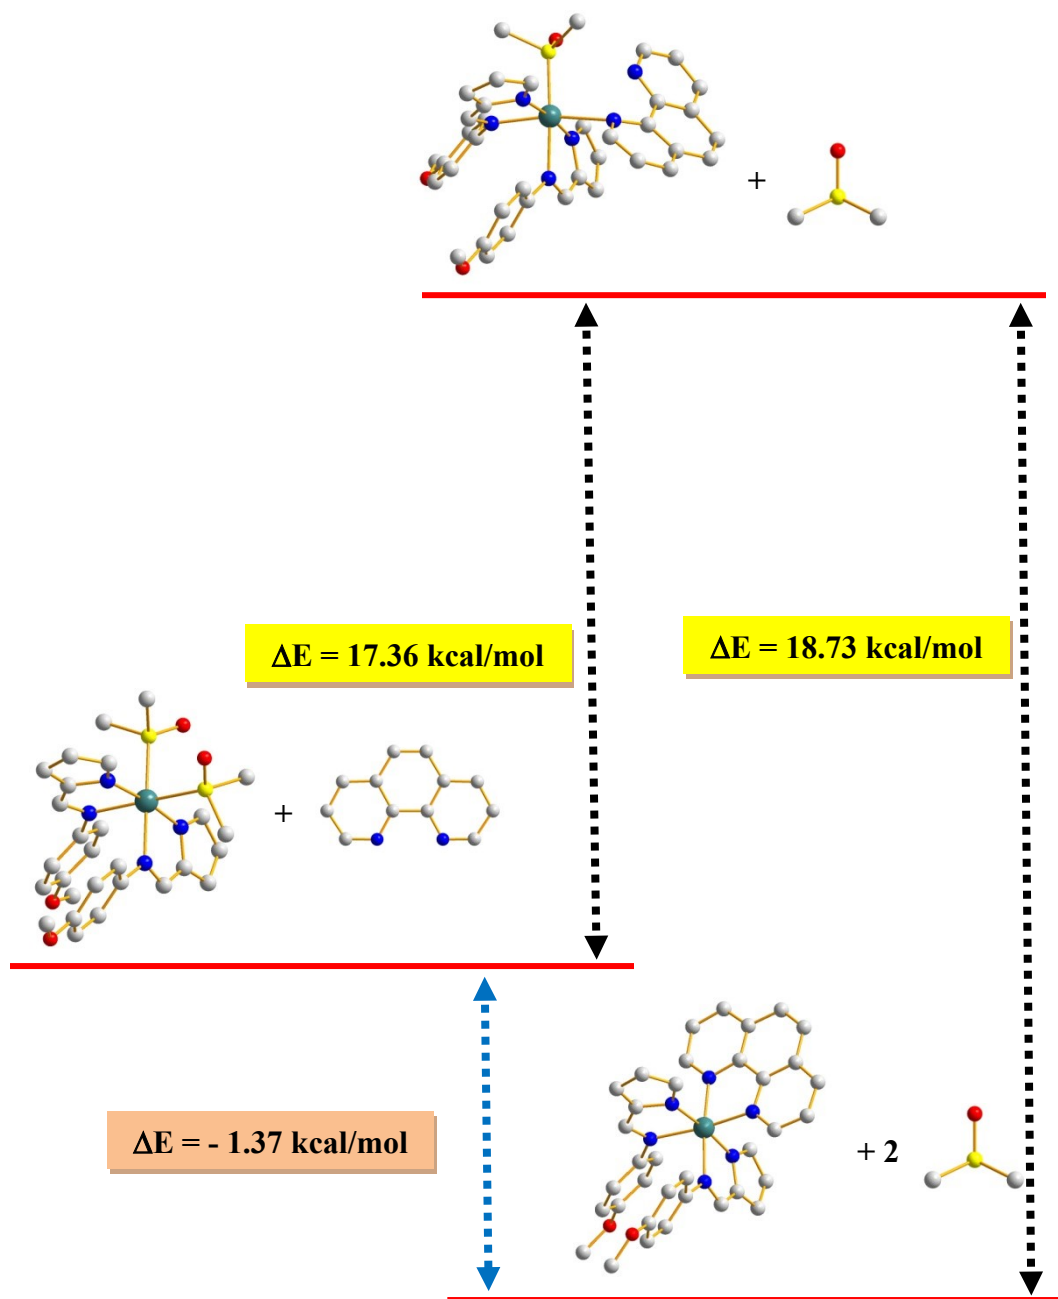

**Fig. S5.** Energy difference ( $\Delta E$ ) between the reactants, intermediates and products for the phen reaction.

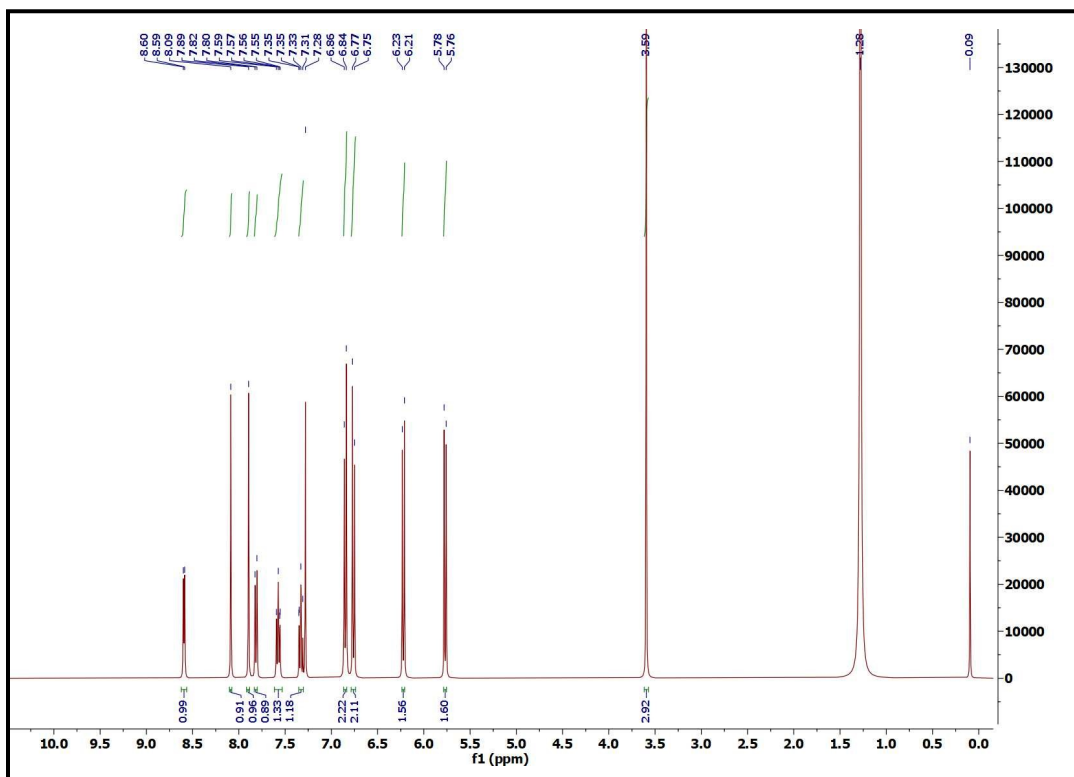

Fig. S6.  $^1\text{H}$  NMR spectrum of  $[\text{Ru}(\text{L-OCH}_3)_2(\text{bpy})]$  in  $\text{CDCl}_3$  solution.

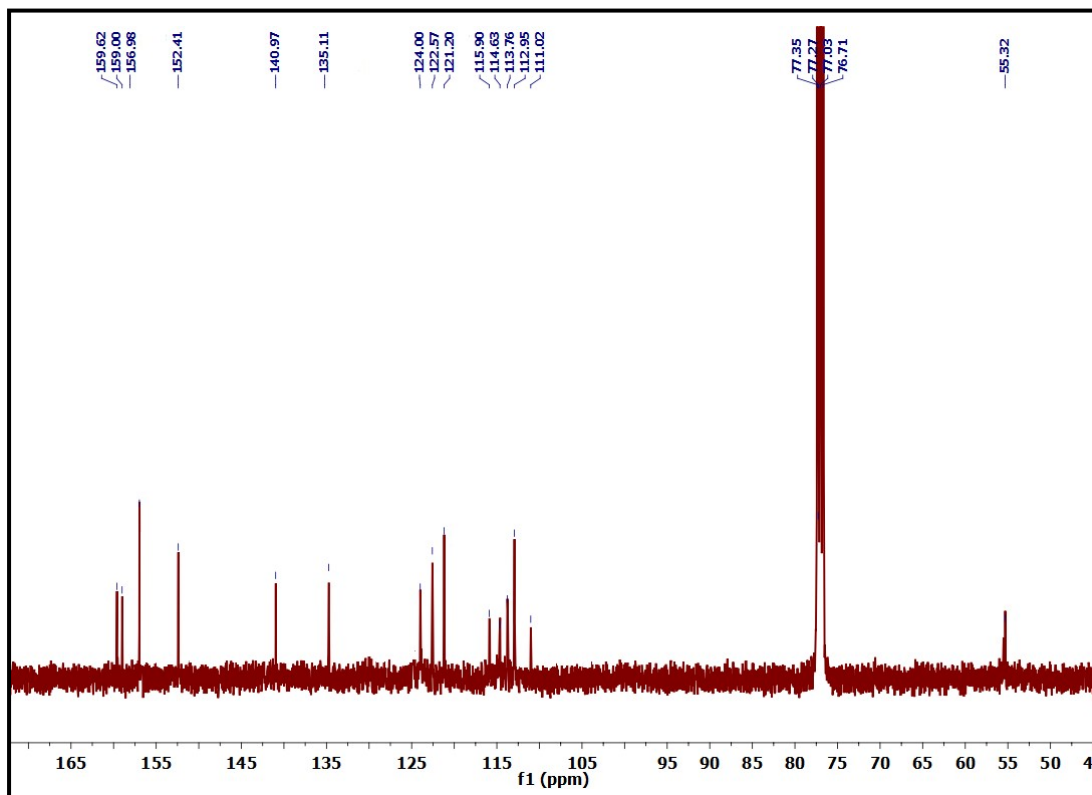

Fig. S7.  $^{13}\text{C}$  NMR spectrum of  $[\text{Ru}(\text{L-OCH}_3)_2(\text{bpy})]$  in  $\text{CDCl}_3$  solution.

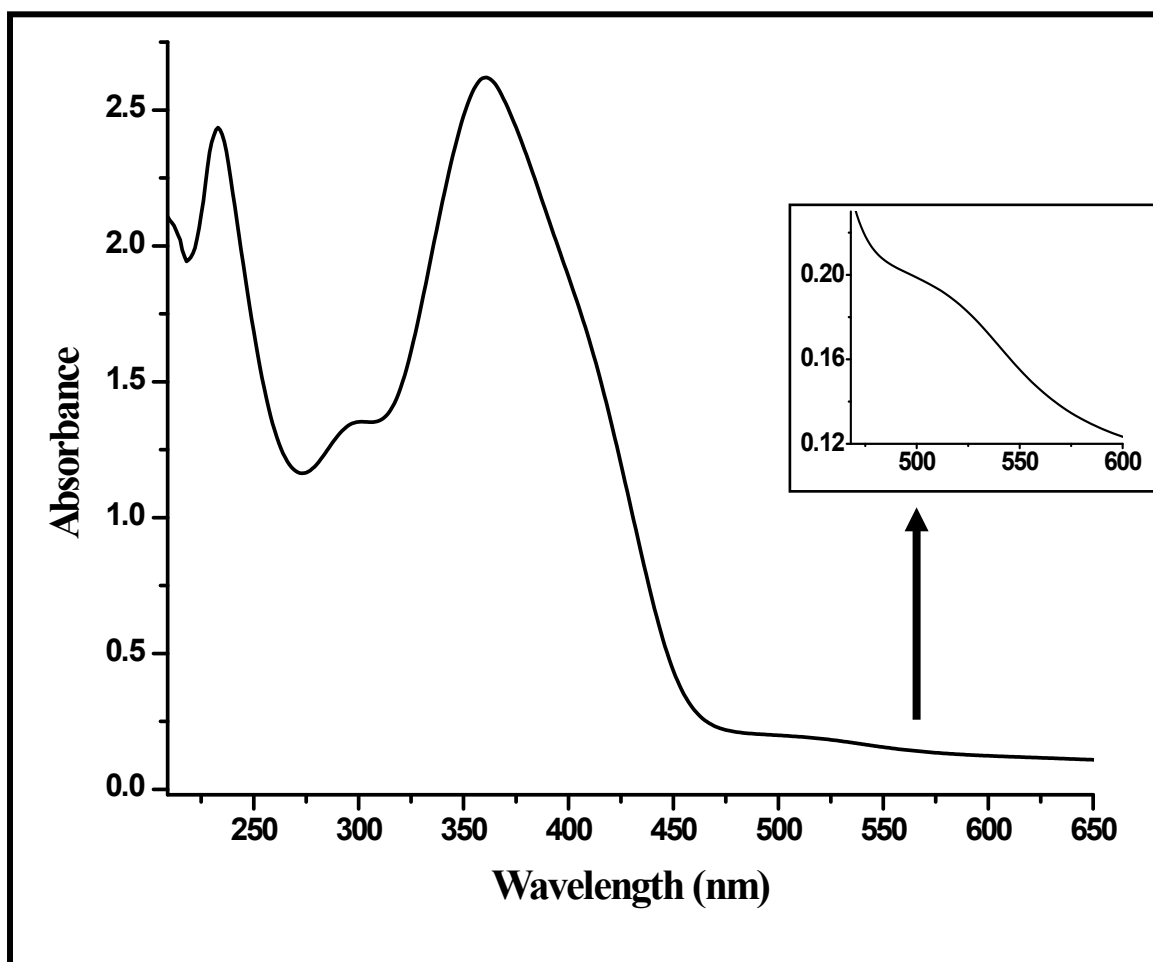

**Fig. S8.** Electronic spectrum of  $[\text{Ru}(\text{L-OCH}_3)_2(\text{dmsO})_2]$  in dichloromethane solution.



**Table S5.** Computed parameters from TDDFT calculations on  $[\text{Ru}(\text{L-OCH}_3)_2(\text{dmsO})_2]$  for electronic spectral properties in dichloromethane solution.

| Excited State | Composition           | CI value | $E$ (eV) | Oscillator strength ( $f$ ) | $\lambda_{\text{theo}}$ (nm) | Assignment                                                         | $\lambda_{\text{exp}}$ (nm) |
|---------------|-----------------------|----------|----------|-----------------------------|------------------------------|--------------------------------------------------------------------|-----------------------------|
| 9             | H-3 $\rightarrow$ L   | 0.52215  | 3.4745   | 0.0182                      | 356.85                       | MLCT/LLCT<br>LLCT/LMCT<br>MLCT/ILCT<br>ILCT/LMCT/LLCT<br>MLCT/ILCT | 361                         |
|               | H-3 $\rightarrow$ L+2 | 0.12248  |          |                             |                              |                                                                    |                             |
|               | H-2 $\rightarrow$ L+1 | 0.40210  |          |                             |                              |                                                                    |                             |
|               | H-2 $\rightarrow$ L+5 | 0.10548  |          |                             |                              |                                                                    |                             |
|               | H $\rightarrow$ L+1   | 0.11512  |          |                             |                              |                                                                    |                             |
| 18            | H-6 $\rightarrow$ L   | 0.12636  | 4.2299   | 0.0748                      | 293.11                       | MLCT/LLCT<br>ILCT/MLCT/LLCT<br>ILCT/LMCT                           | 298                         |
|               | H-4 $\rightarrow$ L   | 0.24950  |          |                             |                              |                                                                    |                             |
|               | H-1 $\rightarrow$ L+3 | 0.62639  |          |                             |                              |                                                                    |                             |
| 45            | H-2 $\rightarrow$ L+7 | 0.10803  | 5.1320   | 0.0198                      | 241.59                       | LLCT/LMCT<br>LLCT/LMCT<br>LMCT/LLCT<br>LMCT/LLCT                   | 233                         |
|               | H-1 $\rightarrow$ L+6 | 0.15783  |          |                             |                              |                                                                    |                             |
|               | H $\rightarrow$ L+7   | 0.64427  |          |                             |                              |                                                                    |                             |
|               | H $\rightarrow$ L+8   | 0.13006  |          |                             |                              |                                                                    |                             |

**Table S6.** Compositions of selected molecular orbitals of  $[\text{Ru}(\text{L-OCH}_3)_2(\text{dmsO})_2]$  associated with the electronic spectral transitions.

| % Contribution of fragments to | Fragments |                        |                        |          |          |
|--------------------------------|-----------|------------------------|------------------------|----------|----------|
|                                | Ru        | L-OCH <sub>3</sub> (1) | L-OCH <sub>3</sub> (2) | DMSO (1) | DMSO (2) |
| HOMO (H)                       | 13        | 43                     | 42                     | 1        | 1        |
| H-1                            | 0         | 48                     | 50                     | 1        | 1        |
| H-2                            | 46        | 26                     | 26                     | 1        | 1        |
| H-3                            | 52        | 23                     | 23                     | 1        | 1        |
| H-4                            | 6         | 46                     | 46                     | 1        | 1        |
| H-6                            | 65        | 14                     | 13                     | 4        | 4        |
| LUMO (L)                       | 4         | 50                     | 46                     | 0        | 0        |
| L+1                            | 3         | 46                     | 49                     | 1        | 1        |
| L+2                            | 55        | 12                     | 12                     | 10       | 11       |
| L+3                            | 2         | 48                     | 48                     | 1        | 1        |
| L+5                            | 52        | 20                     | 20                     | 4        | 4        |
| L+6                            | 18        | 13                     | 13                     | 28       | 28       |
| L+7                            | 59        | 2                      | 2                      | 19       | 18       |
| L+8                            | 19        | 38                     | 37                     | 3        | 3        |

**Table S7.** Computed parameters from TDDFT calculations on [Ru(L-CH<sub>3</sub>)<sub>2</sub>(dmsO)<sub>2</sub>] for electronic spectral properties in dichloromethane solution.

| Excited State | Composition | CI value | <i>E</i> (eV) | Oscillator strength ( <i>f</i> ) | $\lambda_{\text{theo}}$ (nm) | Assignment     | $\lambda_{\text{exp}}$ (nm) |
|---------------|-------------|----------|---------------|----------------------------------|------------------------------|----------------|-----------------------------|
| 10            | H-3 → L     | 0.35155  | 3.5790        | 0.0649                           | 346.42                       | MLCT/LLCT      | 362                         |
|               | H-2 → L+1   | 0.45932  |               |                                  |                              | MLCT           |                             |
|               | H-1 → L     | 0.29312  |               |                                  |                              | LMCT/LLCT      |                             |
|               | H → L+1     | 0.25131  |               |                                  |                              | MLCT           |                             |
| 17            | H-6 → L+1   | 0.11733  | 4.3474        | 0.0791                           | 285.19                       | LMCT           | 296                         |
|               | H-5 → L     | 0.29040  |               |                                  |                              | MLCT/ILCT      |                             |
|               | H-4 → L     | 0.53986  |               |                                  |                              | MLCT/LLCT      |                             |
|               | H-4 → L+2   | 0.22434  |               |                                  |                              | LLCT/LMCT      |                             |
|               | H-1 → L+3   | 0.10327  |               |                                  |                              | LMCT/ILCT/LLCT |                             |
|               | H-1 → L+5   | 0.10910  |               |                                  |                              | LMCT/LLCT      |                             |
|               | H → L+2     | 0.12302  |               |                                  |                              | LMCT/LLCT      |                             |
| 47            | H-10 → L+2  | 0.22300  | 5.1785        | 0.0049                           | 239.42                       | LMCT/LLCT      | 232                         |
|               | H-9 → L+2   | 0.17687  |               |                                  |                              | LMCT/LLCT      |                             |
|               | H-3 → L+5   | 0.13899  |               |                                  |                              | ILCT/MLCT      |                             |
|               | H-3 → L+6   | 0.37084  |               |                                  |                              | MLCT/ILCT      |                             |
|               | H-3 → L+8   | 0.20246  |               |                                  |                              | LLCT/LMCT      |                             |
|               | H-2 → L+2   | 0.10090  |               |                                  |                              | ILCT/LLCT/LMCT |                             |
|               | H-2 → L+7   | 0.10274  |               |                                  |                              | MLCT/ILCT      |                             |
|               | H → L+9     | 0.37242  |               |                                  |                              | LLCT/LMCT      |                             |

**Table S8.** Compositions of selected molecular orbitals of  $[\text{Ru}(\text{L-CH}_3)_2(\text{dmsO})_2]$  associated with the electronic spectral transitions.

| % Contribution of fragments to | Fragments |                        |                        |          |          |
|--------------------------------|-----------|------------------------|------------------------|----------|----------|
|                                | Ru        | L-OCH <sub>3</sub> (1) | L-OCH <sub>3</sub> (2) | DMSO (1) | DMSO (2) |
| HOMO (H)                       | 16        | 41                     | 41                     | 1        | 1        |
| H-1                            | 0         | 49                     | 50                     | 1        | 0        |
| H-2                            | 46        | 26                     | 26                     | 1        | 1        |
| H-3                            | 52        | 23                     | 23                     | 1        | 1        |
| H-4                            | 56        | 18                     | 18                     | 4        | 4        |
| H-5                            | 14        | 42                     | 42                     | 1        | 1        |
| H-6                            | 2         | 48                     | 48                     | 1        | 1        |
| H-9                            | 16        | 36                     | 36                     | 6        | 6        |
| H-10                           | 14        | 35                     | 35                     | 8        | 8        |
| LUMO (L)                       | 4         | 48                     | 48                     | 0        | 0        |
| L+1                            | 3         | 48                     | 47                     | 1        | 1        |
| L+2                            | 54        | 13                     | 13                     | 10       | 10       |
| L+3                            | 1         | 49                     | 48                     | 1        | 1        |
| L+5                            | 44        | 25                     | 25                     | 3        | 3        |
| L+6                            | 21        | 24                     | 24                     | 16       | 15       |
| L+7                            | 7         | 43                     | 43                     | 4        | 3        |
| L+8                            | 62        | 2                      | 2                      | 17       | 17       |
| L+9                            | 20        | 13                     | 13                     | 27       | 27       |

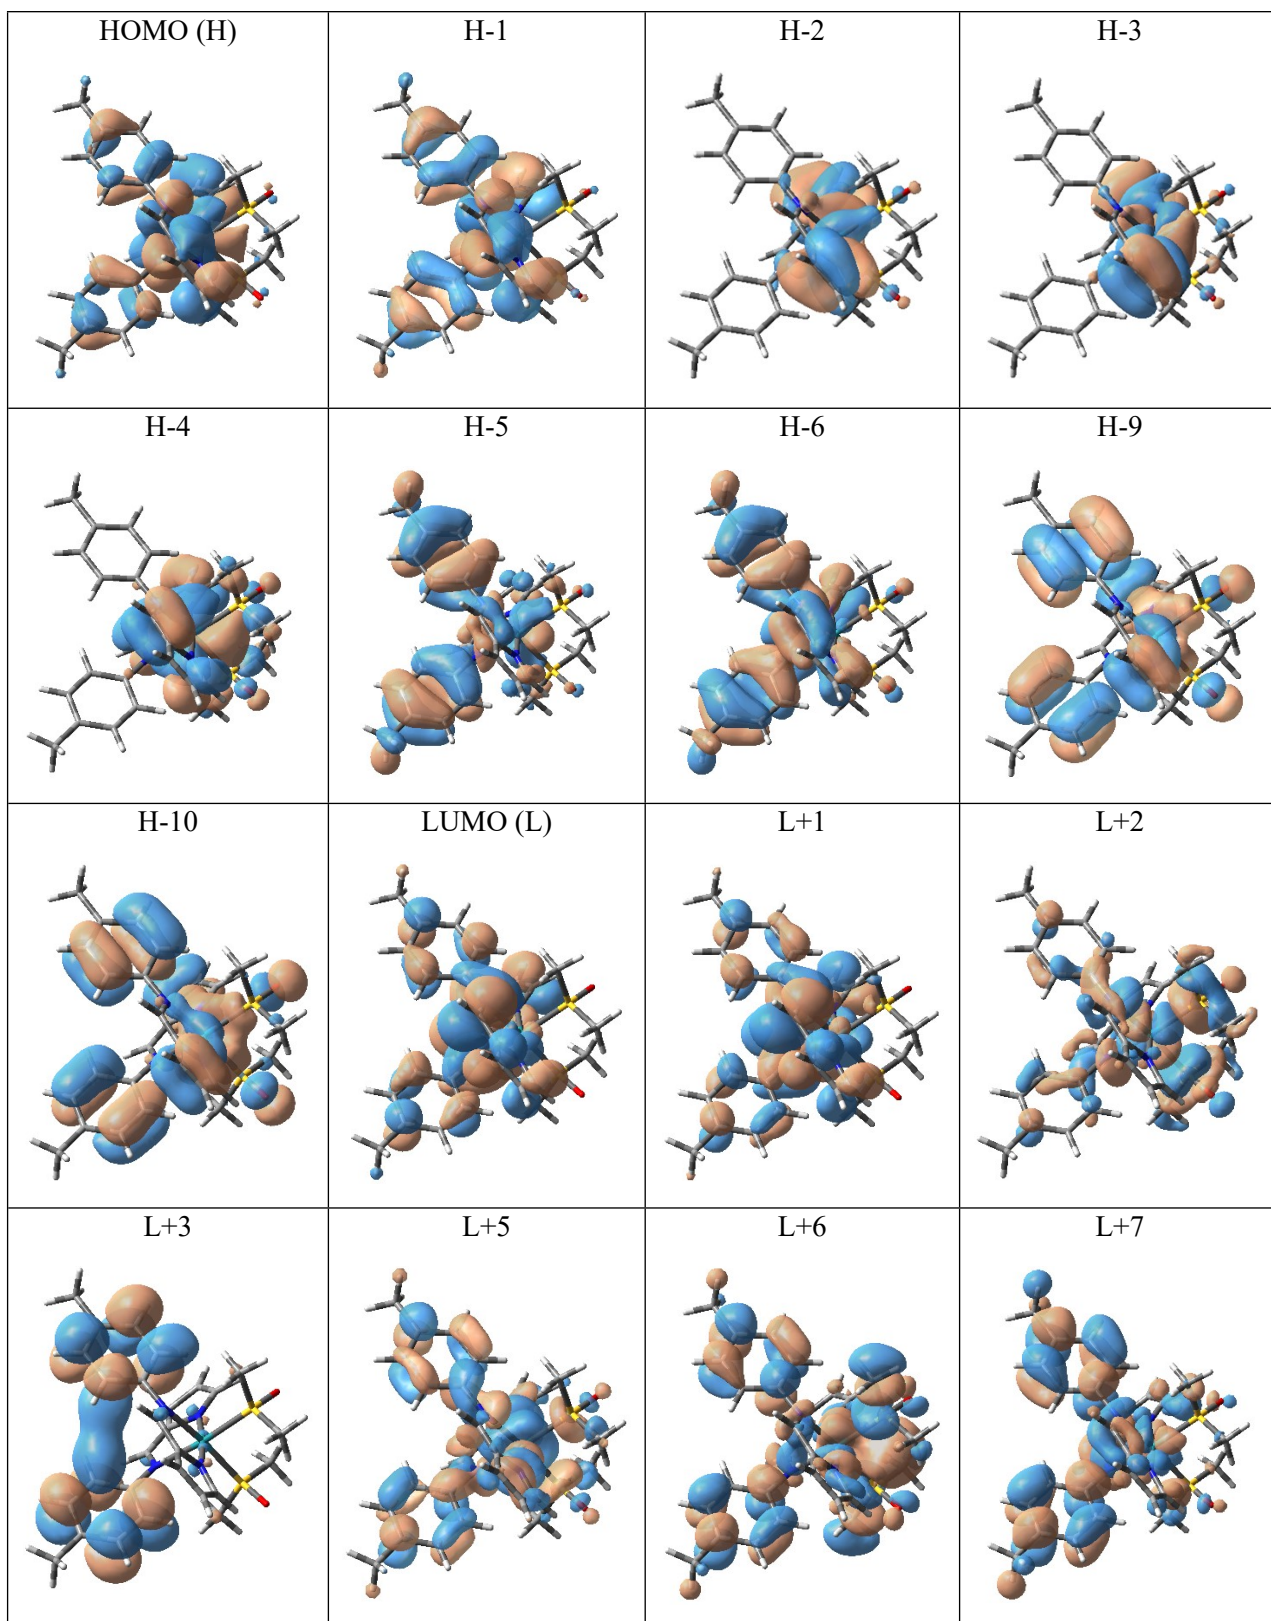

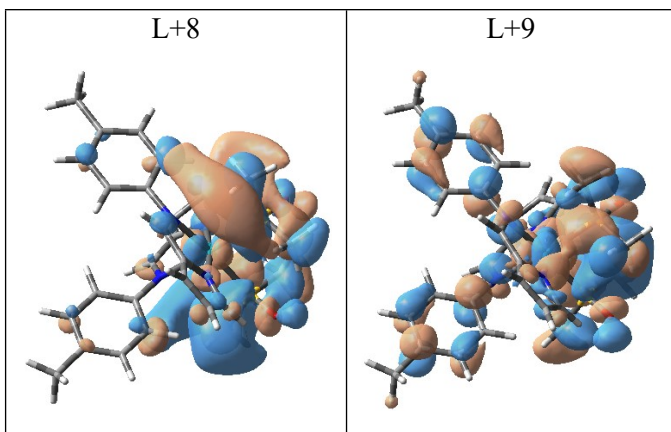

**Fig. S9.** Contour plots of the molecular orbitals of [Ru(L-CH<sub>3</sub>)<sub>2</sub>(dmsO)<sub>2</sub>], which are associated with the electronic spectral transitions (See **Table S7**).

**Table S9.** Computed parameters from TDDFT calculations on [Ru(L-H)<sub>2</sub>(dmsO)<sub>2</sub>] for electronic spectral properties in dichloromethane solution.

| Excited State | Composition            | CI value | $E$ (eV) | Oscillator strength ( $f$ ) | $\lambda_{\text{theo}}$ (nm) | Assignment     | $\lambda_{\text{exp}}$ (nm) |
|---------------|------------------------|----------|----------|-----------------------------|------------------------------|----------------|-----------------------------|
| 10            | H-3 $\rightarrow$ L    | 0.33033  | 3.5831   | 0.0618                      | 346.42                       | MLCT/LLCT      | 362                         |
|               | H-2 $\rightarrow$ L+1  | 0.44927  |          |                             |                              | MLCT/ILCT      |                             |
|               | H-1 $\rightarrow$ L    | 0.32134  |          |                             |                              | LMCT/ILCT      |                             |
|               | H $\rightarrow$ L+1    | 0.26103  |          |                             |                              | MLCT           |                             |
| 18            | H-5 $\rightarrow$ L    | 0.16605  | 4.3719   | 0.0630                      | 283.59                       | MLCT/LLCT      | 294                         |
|               | H-4 $\rightarrow$ L    | 0.53796  |          |                             |                              | MLCT/LLCT      |                             |
|               | H-4 $\rightarrow$ L+2  | 0.29483  |          |                             |                              | LLCT/MLCT      |                             |
|               | H-1 $\rightarrow$ L+3  | 0.14986  |          |                             |                              | ILCT/LMCT      |                             |
|               | H $\rightarrow$ L+2    | 0.16599  |          |                             |                              | LMCT/LLCT      |                             |
| 48            | H-11 $\rightarrow$ L+1 | 0.14411  | 5.2263   | 0.0112                      | 237.23                       | LLCT/MLCT      | 234                         |
|               | H-6 $\rightarrow$ L+2  | 0.23293  |          |                             |                              | LMCT/LLCT      |                             |
|               | H-2 $\rightarrow$ L+5  | 0.15005  |          |                             |                              | ILCT/LLCT/LMCT |                             |
|               | H-2 $\rightarrow$ L+6  | 0.28472  |          |                             |                              | MLCT/ILCT/LLCT |                             |
|               | H-1 $\rightarrow$ L+7  | 0.26006  |          |                             |                              | LMCT/LLCT      |                             |
|               | H $\rightarrow$ L+8    | 0.44984  |          |                             |                              | LMCT/LLCT      |                             |

**Table S10.** Compositions of selected molecular orbitals of  $[\text{Ru}(\text{L-H})_2(\text{dmsO})_2]$  associated with the electronic spectral transitions.

| % Contribution of fragments to | Fragments |                        |                        |          |          |
|--------------------------------|-----------|------------------------|------------------------|----------|----------|
|                                | Ru        | L-OCH <sub>3</sub> (1) | L-OCH <sub>3</sub> (2) | DMSO (1) | DMSO (2) |
| HOMO (H)                       | 17        | 40                     | 41                     | 1        | 1        |
| H-1                            | 0         | 50                     | 49                     | 1        | 0        |
| H-2                            | 45        | 26                     | 27                     | 1        | 1        |
| H-3                            | 52        | 23                     | 23                     | 1        | 1        |
| H-4                            | 61        | 15                     | 15                     | 5        | 4        |
| H-5                            | 10        | 43                     | 43                     | 2        | 2        |
| H-6                            | 30        | 27                     | 27                     | 8        | 8        |
| H-11                           | 16        | 15                     | 15                     | 27       | 27       |
| LUMO (L)                       | 4         | 48                     | 47                     | 1        | 0        |
| L+1                            | 3         | 47                     | 48                     | 1        | 1        |
| L+2                            | 54        | 13                     | 13                     | 10       | 10       |
| L+3                            | 2         | 48                     | 48                     | 1        | 1        |
| L+5                            | 43        | 25                     | 26                     | 3        | 3        |
| L+6                            | 21        | 24                     | 25                     | 15       | 15       |
| L+7                            | 8         | 43                     | 43                     | 3        | 3        |
| L+8                            | 57        | 2                      | 2                      | 20       | 19       |

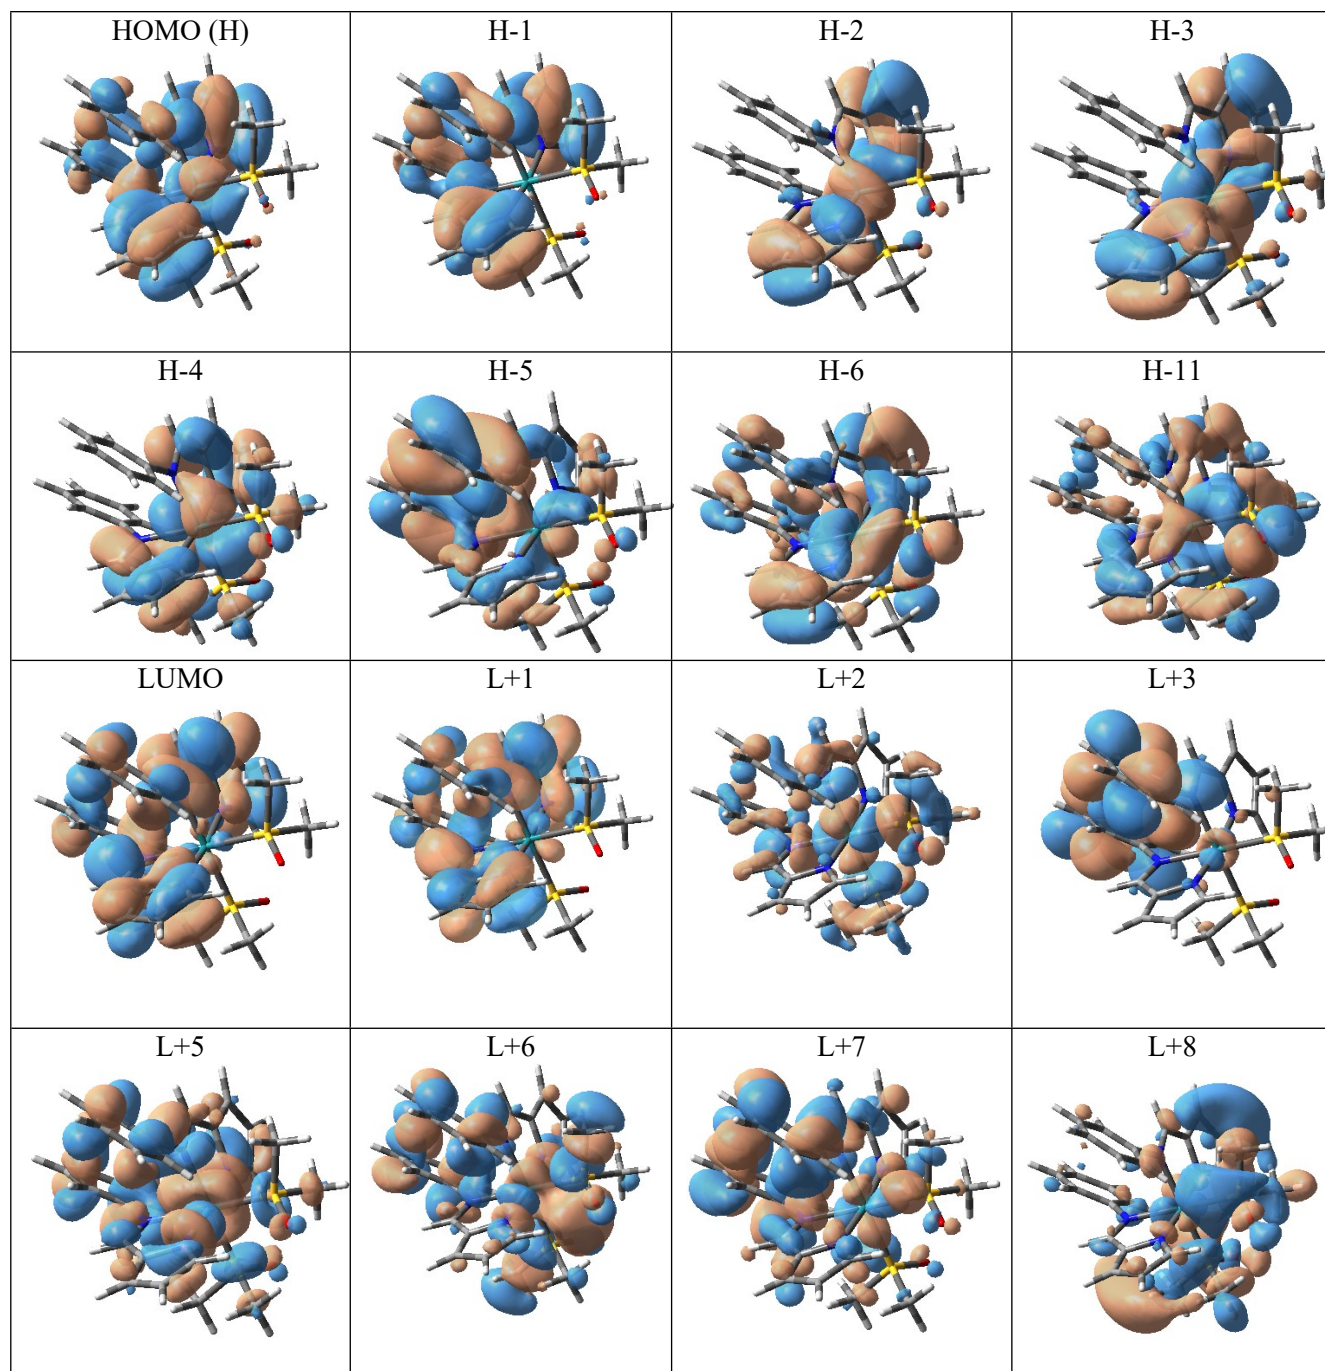

**Fig. S10.** Contour plots of the molecular orbitals of  $[\text{Ru}(\text{L-H})_2(\text{dmsO})_2]$ , which are associated with the electronic spectral transitions (See **Table S9**).



**Table S11.** Computed parameters from TDDFT calculations on [Ru(L-Cl)<sub>2</sub>(dmsO)<sub>2</sub>] for electronic spectral properties in dichloromethane solution.

| Excited State | Composition           | CI value | $E$ (eV) | Oscillator strength ( $f$ ) | $\lambda_{\text{theo}}$ (nm) | Assignment     | $\lambda_{\text{exp}}$ (nm) |
|---------------|-----------------------|----------|----------|-----------------------------|------------------------------|----------------|-----------------------------|
| 10            | H-3 $\rightarrow$ L   | 0.31217  | 3.5191   | 0.0812                      | 352.32                       | MLCT/LLCT      | 368                         |
|               | H-2 $\rightarrow$ L+1 | 0.47843  |          |                             |                              | MLCT/LLCT      |                             |
|               | H-1 $\rightarrow$ L   | 0.29867  |          |                             |                              | LMCT           |                             |
|               | H $\rightarrow$ L+1   | 0.25777  |          |                             |                              | MLCT/LLCT      |                             |
| 21            | H-5 $\rightarrow$ L   | 0.16977  | 4.3393   | 0.0783                      | 285.72                       | MLCT/LLCT      | 301                         |
|               | H-5 $\rightarrow$ L+2 | 0.10364  |          |                             |                              | LMCT/LLCT      |                             |
|               | H-4 $\rightarrow$ L   | 0.44230  |          |                             |                              | MLCT/LLCT      |                             |
|               | H-4 $\rightarrow$ L+2 | 0.37961  |          |                             |                              | MLCT/LLCT      |                             |
|               | H $\rightarrow$ L+2   | 0.21509  |          |                             |                              | LMCT/LLCT      |                             |
|               | H $\rightarrow$ L+4   | 0.20806  |          |                             |                              | MLCT           |                             |
| 48            | H-11 $\rightarrow$ L  | 0.35133  | 5.1433   | 0.0145                      | 241.06                       | LLCT/MLCT      | 224                         |
|               | H-8 $\rightarrow$ L+2 | 0.17869  |          |                             |                              | LMCT/ILCT      |                             |
|               | H-5 $\rightarrow$ L+2 | 0.10853  |          |                             |                              | LMCT/LLCT      |                             |
|               | H-3 $\rightarrow$ L+5 | 0.18709  |          |                             |                              | MLCT/LLCT      |                             |
|               | H-3 $\rightarrow$ L+6 | 0.30032  |          |                             |                              | MLCT/LLCT      |                             |
|               | H-2 $\rightarrow$ L+2 | 0.10998  |          |                             |                              | LLCT/LMCT/ILCT |                             |
|               | H-2 $\rightarrow$ L+7 | 0.36800  |          |                             |                              | MLCT/LLCT      |                             |
|               | H-2 $\rightarrow$ L+8 | 0.13372  |          |                             |                              | LLCT/LMCT/ILCT |                             |

**Table S12.** Compositions of selected molecular orbitals of  $[\text{Ru}(\text{L-Cl})_2(\text{dmsO})_2]$  associated with the electronic spectral transitions.

| % Contribution of fragments to | Fragments |                        |                        |          |          |
|--------------------------------|-----------|------------------------|------------------------|----------|----------|
|                                | Ru        | L-OCH <sub>3</sub> (1) | L-OCH <sub>3</sub> (2) | DMSO (1) | DMSO (2) |
| HOMO (H)                       | 17        | 41                     | 40                     | 1        | 1        |
| H-1                            | 0         | 49                     | 49                     | 1        | 1        |
| H-2                            | 45        | 26                     | 27                     | 1        | 1        |
| H-3                            | 52        | 23                     | 23                     | 1        | 1        |
| H-4                            | 60        | 16                     | 16                     | 4        | 4        |
| H-5                            | 11        | 43                     | 44                     | 1        | 1        |
| H-8                            | 28        | 20                     | 20                     | 16       | 16       |
| H-11                           | 18        | 17                     | 17                     | 24       | 24       |
| LUMO (L)                       | 4         | 48                     | 48                     | 0        | 0        |
| L+1                            | 3         | 48                     | 48                     | 1        | 0        |
| L+2                            | 52        | 14                     | 14                     | 10       | 10       |
| L+4                            | 2         | 48                     | 48                     | 1        | 1        |
| L+5                            | 35        | 30                     | 30                     | 3        | 2        |
| L+6                            | 29        | 26                     | 26                     | 10       | 10       |
| L+7                            | 8         | 43                     | 43                     | 3        | 3        |
| L+8                            | 50        | 12                     | 12                     | 13       | 13       |

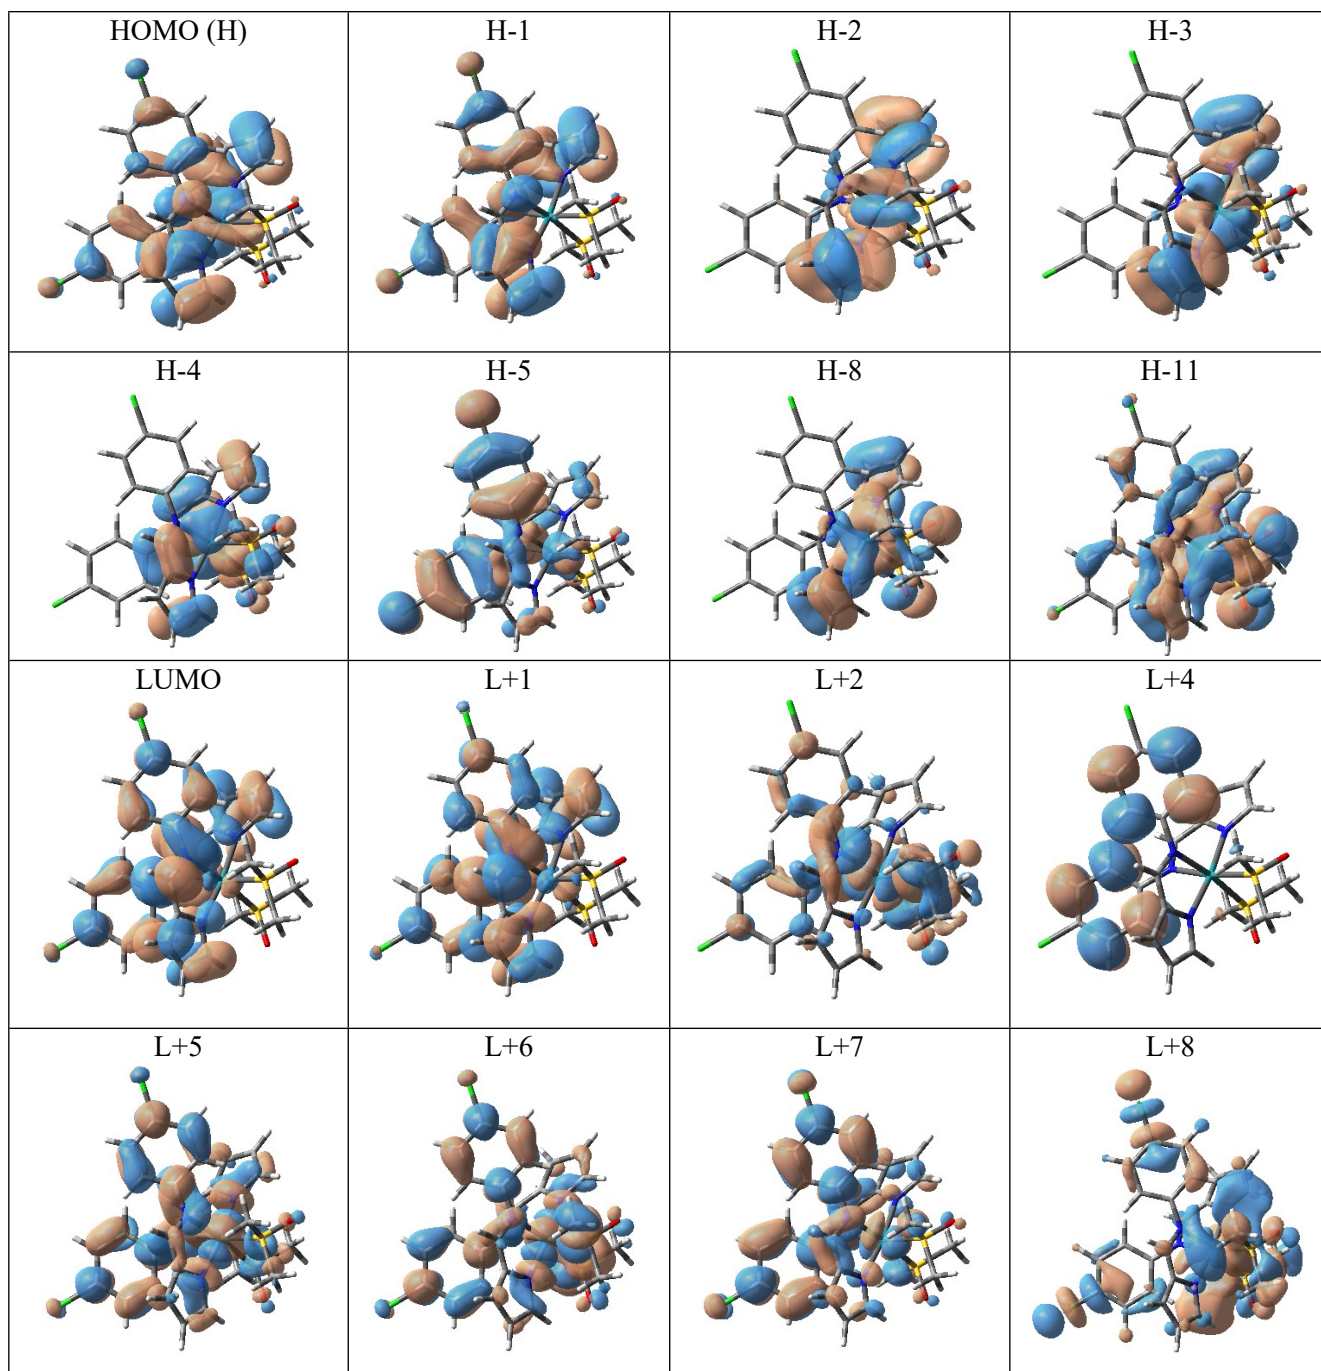

**Fig. S11.** Contour plots of the molecular orbitals of  $[\text{Ru}(\text{L-Cl})_2(\text{dmsO})_2]$ , which are associated with the electronic spectral transitions (See **Table S11**).

**Table S13.** Computed parameters from TDDFT calculations on [Ru(L-OCH<sub>3</sub>)<sub>2</sub>(bpy)] for electronic spectral properties in dichloromethane solution.

| Excited State | Composition            | CI value | $E$ (eV) | Oscillator strength ( $f$ ) | $\lambda_{\text{theo}}$ (nm) | Assignment | $\lambda_{\text{exp}}$ (nm) |
|---------------|------------------------|----------|----------|-----------------------------|------------------------------|------------|-----------------------------|
| 3             | H-3 $\rightarrow$ L    | 0.39991  | 2.3083   | 0.0758                      | 537.11                       | MLCT/LLCT  | 585                         |
|               | H-2 $\rightarrow$ L    | 0.55631  |          |                             |                              | MLCT/LLCT  |                             |
| 14            | H-3 $\rightarrow$ L+3  | 0.43733  | 3.1573   | 0.1032                      | 392.70                       | MLCT/LLCT  | 428                         |
|               | H-3 $\rightarrow$ L+4  | 0.14873  |          |                             |                              | MLCT/LLCT  |                             |
|               | H-2 $\rightarrow$ L+3  | 0.27789  |          |                             |                              | MLCT/LLCT  |                             |
|               | H-1 $\rightarrow$ L+2  | 0.40105  |          |                             |                              | LLCT/LMCT  |                             |
|               | H $\rightarrow$ L+2    | 0.11966  |          |                             |                              | MLCT/LLCT  |                             |
| 27            | H-8 $\rightarrow$ L    | 0.69257  | 3.7463   | 0.0036                      | 330.95                       | LLCT/MLCT  | 336                         |
| 52            | H-7 $\rightarrow$ L+2  | 0.10258  | 4.5465   | 0.0358                      | 272.70                       | LLCT/MLCT  | 266                         |
|               | H-6 $\rightarrow$ L+1  | 0.34118  |          |                             |                              | LLCT/LMCT  |                             |
|               | H-6 $\rightarrow$ L+2  | 0.23555  |          |                             |                              | LLCT/LMCT  |                             |
|               | H-5 $\rightarrow$ L+3  | 0.31180  |          |                             |                              | ILCT/LMCT  |                             |
|               | H-5 $\rightarrow$ L+4  | 0.15936  |          |                             |                              | ILCT/LMCT  |                             |
|               | H-3 $\rightarrow$ L+8  | 0.28652  |          |                             |                              | MLCT/ILCT  |                             |
|               | H-2 $\rightarrow$ L+8  | 0.27896  |          |                             |                              | MLCT/LLCT  |                             |
| 155           | H-10 $\rightarrow$ L+6 | 0.13321  | 6.4047   | 0.0771                      | 193.58                       | LMCT/LLCT  | 234                         |
|               | H-5 $\rightarrow$ L+10 | 0.12661  |          |                             |                              | LMCT/LLCT  |                             |
|               | H-1 $\rightarrow$ L+16 | 0.62420  |          |                             |                              | LLCT/LMCT  |                             |

**Table S14.** Compositions of selected molecular orbitals of [Ru(L-OCH<sub>3</sub>)<sub>2</sub>(bpy)] associated with the electronic spectral transitions.

| % Contribution<br>of fragments to | Fragments |                        |                        |     |
|-----------------------------------|-----------|------------------------|------------------------|-----|
|                                   | Ru        | L-OCH <sub>3</sub> (1) | L-OCH <sub>3</sub> (2) | bpy |
| HOMO (H)                          | 37        | 30                     | 30                     | 3   |
| H-1                               | 1         | 50                     | 49                     | 0   |
| H-2                               | 55        | 21                     | 21                     | 3   |
| H-3                               | 54        | 17                     | 17                     | 12  |
| H-5                               | 3         | 49                     | 48                     | 0   |
| H-6                               | 1         | 49                     | 50                     | 0   |
| H-7                               | 23        | 35                     | 35                     | 7   |
| H-8                               | 23        | 36                     | 36                     | 5   |
| H-10                              | 0         | 50                     | 50                     | 0   |
| LUMO (L)                          | 7         | 1                      | 1                      | 91  |
| L+1                               | 4         | 1                      | 1                      | 94  |
| L+2                               | 3         | 0                      | 0                      | 97  |
| L+3                               | 4         | 48                     | 48                     | 0   |
| L+4                               | 4         | 48                     | 47                     | 1   |
| L+6                               | 7         | 46                     | 46                     | 1   |
| L+8                               | 46        | 20                     | 19                     | 15  |
| L+10                              | 73        | 13                     | 13                     | 1   |
| L+16                              | 2         | 35                     | 35                     | 28  |

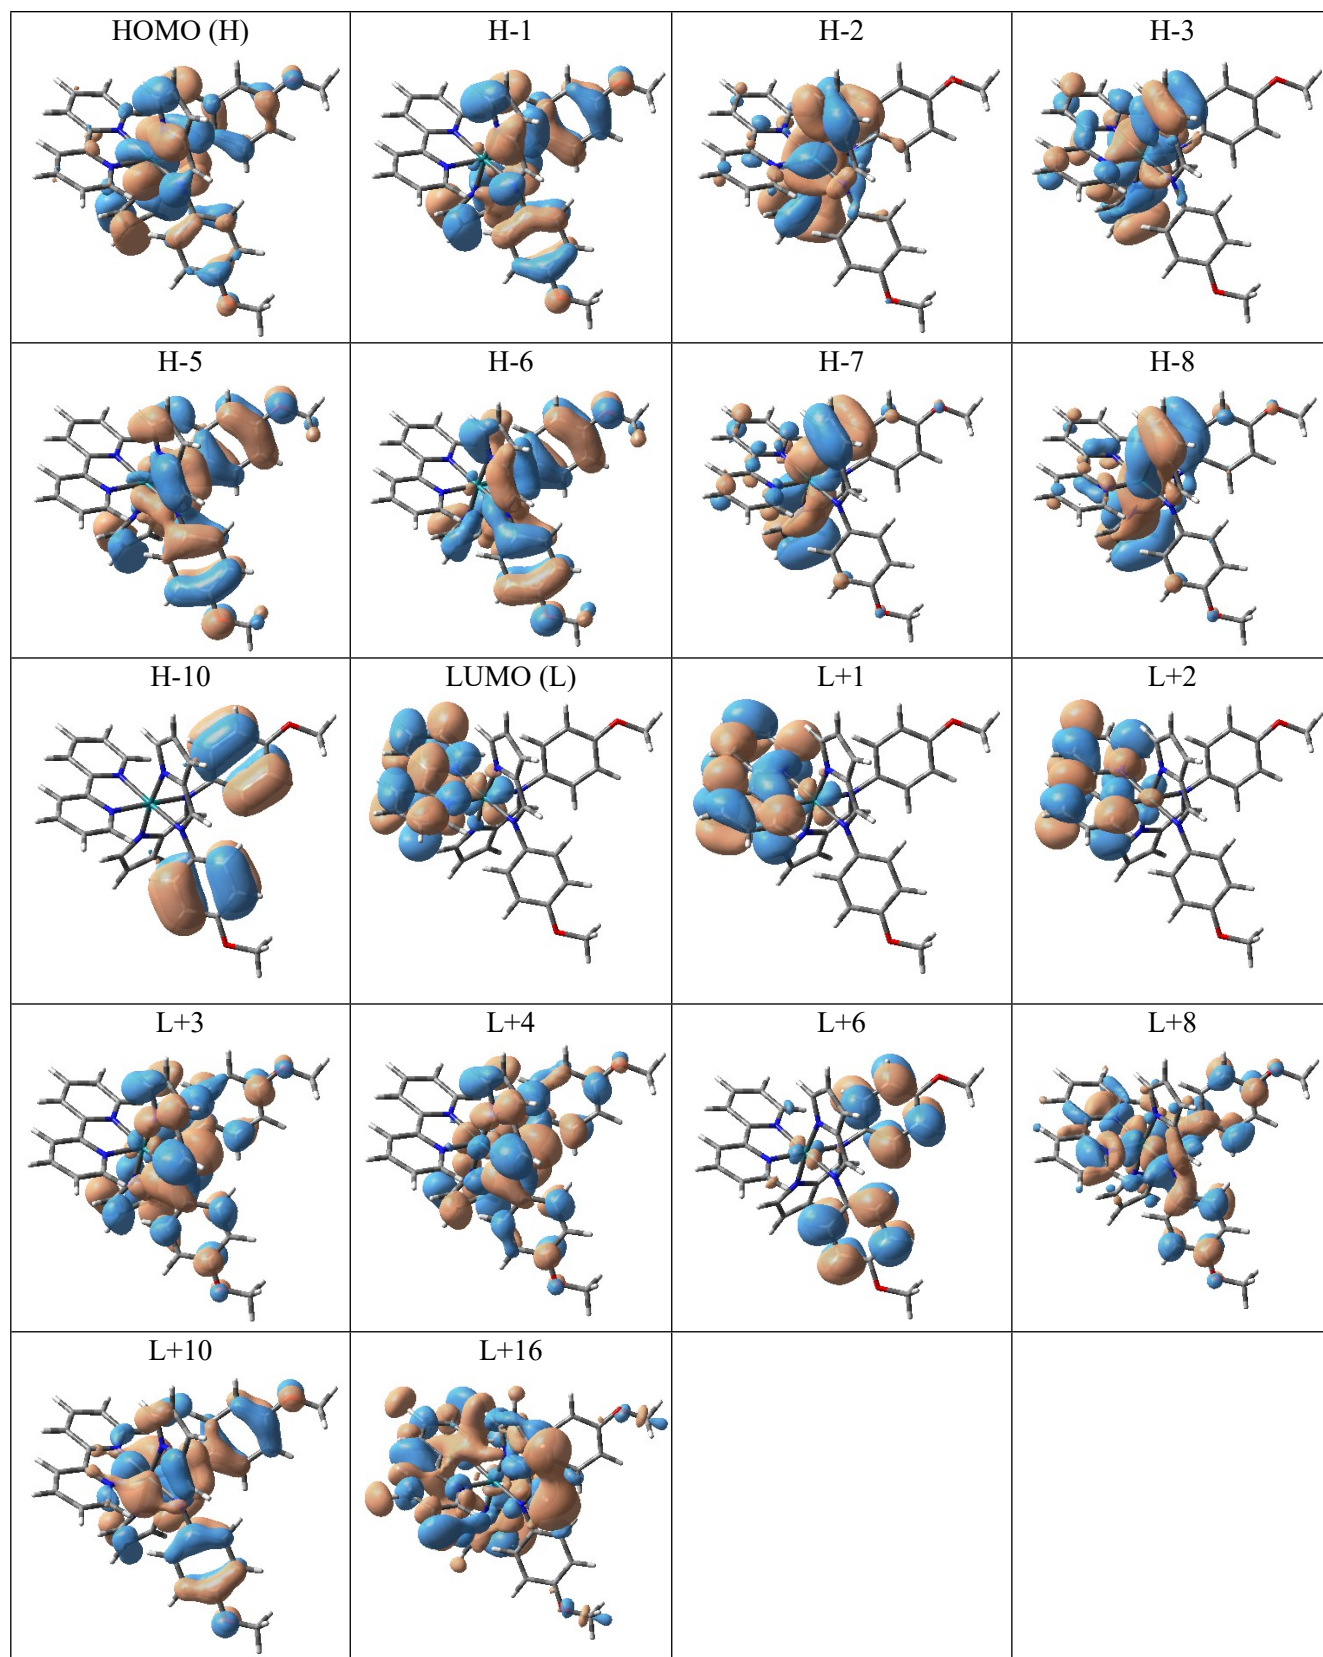

**Fig. S12.** Contour plots of the molecular orbitals of  $[\text{Ru}(\text{L-OCH}_3)_2(\text{bpy})]$  which are associated with the electronic spectral transitions (See **Table S13**).

**Table S15.** Computed parameters from TDDFT calculations on [Ru(L-OCH<sub>3</sub>)<sub>2</sub>(phen)] for electronic spectral properties in dichloromethane solution.

| Excited State | Composition                                                                 | CI value                                                       | <i>E</i> (eV) | Oscillator strength ( <i>f</i> ) | $\lambda_{\text{theo}}$ (nm) | Assignment                                                            | $\lambda_{\text{exp}}$ (nm) |
|---------------|-----------------------------------------------------------------------------|----------------------------------------------------------------|---------------|----------------------------------|------------------------------|-----------------------------------------------------------------------|-----------------------------|
| 7             | H-3 → L<br>H-2 → L<br>H-1 → L+1<br>H → L+1                                  | 0.46170<br>0.41324<br>0.28254<br>0.13857                       | 2.4477        | 0.1421                           | 506.54                       | MLCT/LLCT<br>MLCT/LLCT<br>LLCT/LMCT<br>LLCT/MLCT                      | 563                         |
| 16            | H-3 → L+2<br>H-2 → L+2<br>H-2 → L+4<br>H-1 → L+3<br>H → L+3                 | 0.37172<br>0.18283<br>0.10159<br>0.50468<br>0.17454            | 3.2560        | 0.0082                           | 380.79                       | MLCT/LLCT<br>MLCT/LLCT<br>MLCT/LLCT<br>LLCT/LMCT<br>MLCT              | 405                         |
| 30            | H-8 → L<br>H-6 → L+1                                                        | 0.62869<br>0.29257                                             | 3.7849        | 0.0025                           | 327.58                       | LLCT/MLCT<br>LLCT/LMCT                                                | 334                         |
| 70            | H-12 → L<br>H-12 → L+4<br>H-11 → L+1<br>H-9 → L+1<br>H-8 → L+4<br>H-7 → L+1 | 0.54547<br>0.12438<br>0.26289<br>0.14407<br>0.17899<br>0.12295 | 4.8252        | 0.6994                           | 256.95                       | ILCT<br>LLCT/LMCT<br>LMCT/LLCT<br>LLCT/LMCT<br>MLCT/LLCT<br>LLCT/MLCT | 266                         |
| 157           | H-10 → L+6<br>H-9 → L+5                                                     | 0.31295<br>0.59951                                             | 6.2786        | 0.1044                           | 197.47                       | ILCT<br>LLCT/LMCT                                                     | 231                         |

**Table S16.** Compositions of selected molecular orbitals of [Ru(L-OCH<sub>3</sub>)<sub>2</sub>(phen)] associated with the electronic spectral transitions.

| % Contribution<br>of fragments to | Fragments |                        |                        |      |
|-----------------------------------|-----------|------------------------|------------------------|------|
|                                   | Ru        | L-OCH <sub>3</sub> (1) | L-OCH <sub>3</sub> (2) | phen |
| HOMO (H)                          | 36        | 31                     | 31                     | 2    |
| H-1                               | 1         | 49                     | 49                     | 1    |
| H-2                               | 55        | 21                     | 21                     | 3    |
| H-3                               | 55        | 17                     | 17                     | 11   |
| H-6                               | 1         | 50                     | 49                     | 0    |
| H-7                               | 21        | 35                     | 35                     | 9    |
| H-8                               | 23        | 36                     | 36                     | 5    |
| H-9                               | 0         | 50                     | 49                     | 1    |
| H-10                              | 0         | 50                     | 50                     | 0    |
| H-11                              | 4         | 4                      | 3                      | 89   |
| H-12                              | 1         | 1                      | 0                      | 98   |
| LUMO (L)                          | 2         | 0                      | 0                      | 98   |
| L+1                               | 8         | 1                      | 1                      | 90   |
| L+2                               | 3         | 10                     | 10                     | 77   |
| L+3                               | 5         | 38                     | 38                     | 19   |
| L+4                               | 4         | 47                     | 48                     | 1    |
| L+5                               | 1         | 1                      | 0                      | 98   |
| L+6                               | 1         | 49                     | 49                     | 1    |



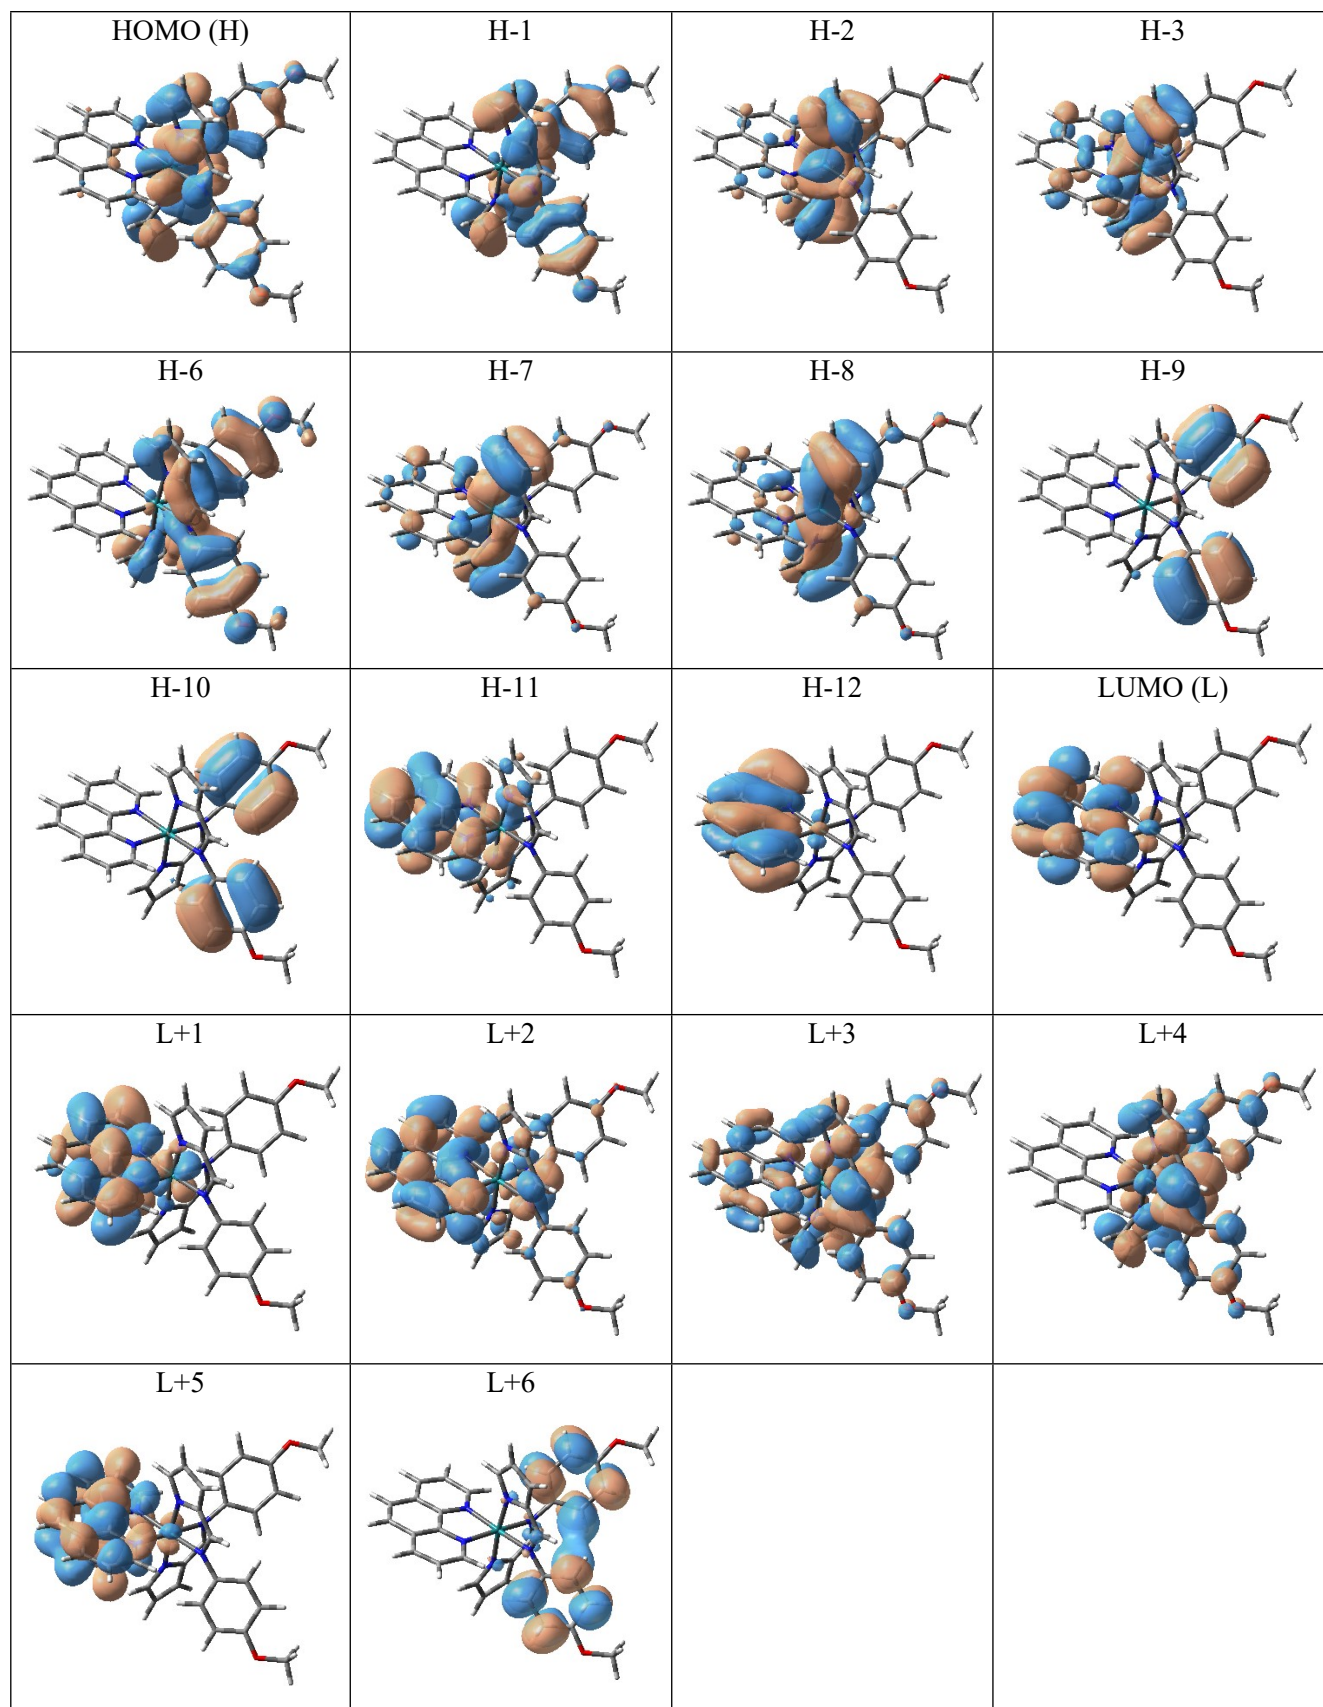

**Fig. S13.** Contour plots of the molecular orbitals of  $[\text{Ru}(\text{L-OCH}_3)_2(\text{phen})]$  which are associated with the electronic spectral transitions (See **Table S15**).

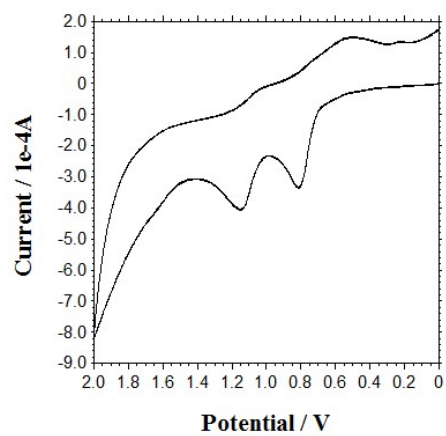

**Fig. S14.** Cyclic voltammogram of  $[\text{Ru}(\text{L-CH}_3)_2(\text{dms})_2]$  in acetonitrile solution (0.1 M TBHP) at a scan rate of  $100 \text{ mVs}^{-1}$ .

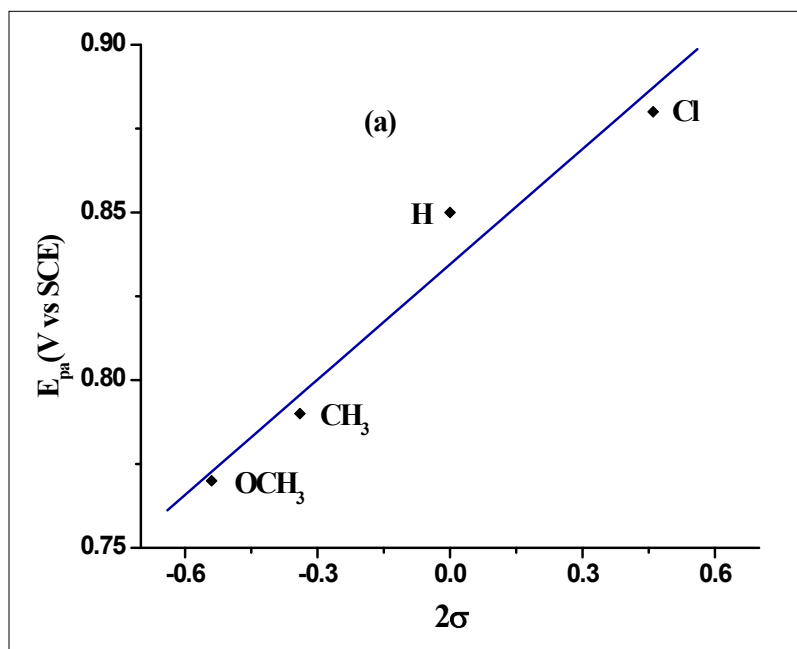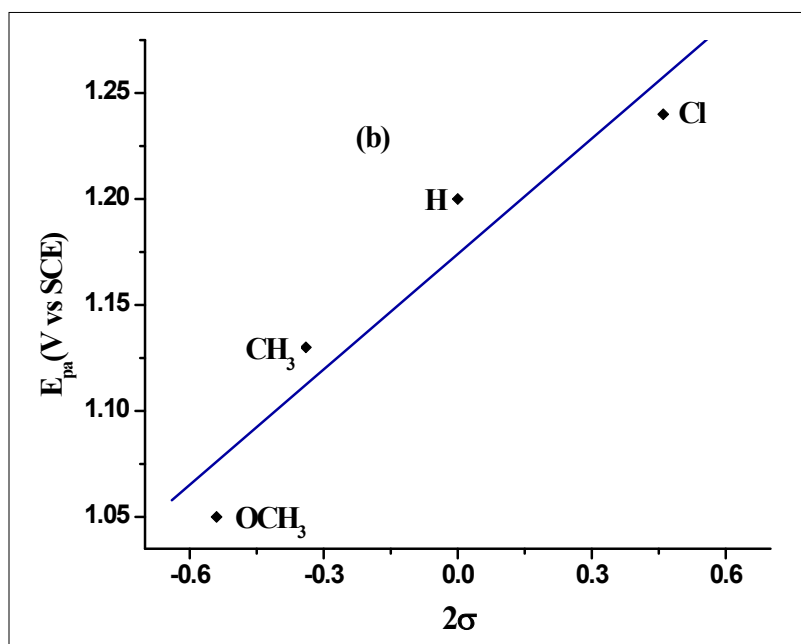

**Fig. S15.** Least squares plot of  $E_{pa}$  values of (a) Ru(II)-Ru(III) oxidation vs  $2\sigma$  and (b) Ru(III)-Ru(IV) oxidation vs  $2\sigma$ .

**Table S17.** Crystallographic data for [Ru(L-OCH<sub>3</sub>)<sub>2</sub>(dmsO)<sub>2</sub>] and [Ru(L-CH<sub>3</sub>)<sub>2</sub>(dmsO)<sub>2</sub>].

| complex                                       | [Ru(L-OCH <sub>3</sub> ) <sub>2</sub> (dmsO) <sub>2</sub> ]                    | [Ru(L-CH <sub>3</sub> ) <sub>2</sub> (dmsO) <sub>2</sub> ]                     |
|-----------------------------------------------|--------------------------------------------------------------------------------|--------------------------------------------------------------------------------|
| empirical formula                             | C <sub>28</sub> H <sub>34</sub> N <sub>4</sub> O <sub>4</sub> RuS <sub>2</sub> | C <sub>28</sub> H <sub>34</sub> N <sub>4</sub> O <sub>2</sub> RuS <sub>2</sub> |
| formula weight                                | 655.78                                                                         | 623.78                                                                         |
| crystal system                                | Monoclinic                                                                     | Monoclinic                                                                     |
| space group                                   | P2 <sub>1</sub> /c                                                             | P2 <sub>1</sub> /c                                                             |
| <i>a</i> (Å)                                  | 11.261(6)                                                                      | 9.9413(11)                                                                     |
| <i>b</i> (Å)                                  | 14.816(8)                                                                      | 21.144(2)                                                                      |
| <i>c</i> (Å)                                  | 17.804(9)                                                                      | 13.6997(14)                                                                    |
| α (°)                                         | 90                                                                             | 90                                                                             |
| β (°)                                         | 105.319(15)                                                                    | 101.252(3)                                                                     |
| γ (°)                                         | 90                                                                             | 90                                                                             |
| <i>V</i> (Å <sup>3</sup> )                    | 2865(3)                                                                        | 2824.3(5)                                                                      |
| <i>Z</i>                                      | 4                                                                              | 4                                                                              |
| <i>D</i> <sub>calcd</sub> /g cm <sup>-3</sup> | 1.520                                                                          | 1.467                                                                          |
| <i>F</i> (000)                                | 1352                                                                           | 1288                                                                           |
| crystal size (mm)                             | 0.28 × 0.32 × 0.36                                                             | 0.24 × 0.38 × 0.42                                                             |
| <i>T</i> (K)                                  | 293                                                                            | 273                                                                            |
| μ (mm <sup>-1</sup> )                         | 0.734                                                                          | 0.735                                                                          |
| R1 <sup>a</sup>                               | 0.0501                                                                         | 0.0298                                                                         |
| wR2 <sup>b</sup>                              | 0.1453                                                                         | 0.0829                                                                         |
| GOF <sup>c</sup>                              | 1.148                                                                          | 1.084                                                                          |

$$^a \text{R1} = \Sigma ||F_o| - |F_c|| / \Sigma |F_o|$$

$$^b \text{wR2} = [\Sigma \{w(F_o^2 - F_c^2)^2\} / \Sigma \{w(F_o^2)\}]^{1/2}$$

$$^c \text{GOF} = [\Sigma (w(F_o^2 - F_c^2)^2) / (M - N)]^{1/2}, \text{ where } M \text{ is the number of reflections and } N \text{ is the number of parameters refined.}$$

**Table S18.** Crystallographic data for [Ru(L-H)<sub>2</sub>(dmsO)<sub>2</sub>] and [Ru(L-Cl)<sub>2</sub>(dmsO)<sub>2</sub>].

| complex                                       | [Ru(L-H) <sub>2</sub> (dmsO) <sub>2</sub> ]                                    | [Ru(L-Cl) <sub>2</sub> (dmsO) <sub>2</sub> ]                                                   |
|-----------------------------------------------|--------------------------------------------------------------------------------|------------------------------------------------------------------------------------------------|
| empirical formula                             | C <sub>26</sub> H <sub>30</sub> N <sub>4</sub> O <sub>2</sub> RuS <sub>2</sub> | C <sub>26</sub> H <sub>28</sub> Cl <sub>2</sub> N <sub>4</sub> O <sub>2</sub> RuS <sub>2</sub> |
| formula weight                                | 595.73                                                                         | 664.63                                                                                         |
| crystal system                                | Monoclinic                                                                     | Monoclinic                                                                                     |
| space group                                   | C2/c                                                                           | C2                                                                                             |
| <i>a</i> (Å)                                  | 14.9301(12)                                                                    | 16.0714(13)                                                                                    |
| <i>b</i> (Å)                                  | 12.2534(10)                                                                    | 10.2764(8)                                                                                     |
| <i>c</i> (Å)                                  | 14.5416(12)                                                                    | 8.3434(7)                                                                                      |
| $\alpha$ (°)                                  | 90                                                                             | 90                                                                                             |
| $\beta$ (°)                                   | 97.136(2)                                                                      | 95.284(2)                                                                                      |
| $\gamma$ (°)                                  | 90                                                                             | 90                                                                                             |
| <i>V</i> (Å <sup>3</sup> )                    | 2639.7(4)                                                                      | 1372.11(19)                                                                                    |
| <i>Z</i>                                      | 4                                                                              | 2                                                                                              |
| <i>D</i> <sub>calcd</sub> /mg m <sup>-3</sup> | 1.499                                                                          | 1.609                                                                                          |
| <i>F</i> (000)                                | 1224                                                                           | 676                                                                                            |
| crystal size (mm)                             | 0.11 × 0.22 × 0.31                                                             | 0.20 × 0.24 × 0.32                                                                             |
| <i>T</i> (K)                                  | 273                                                                            | 273                                                                                            |
| $\mu$ (mm <sup>-1</sup> )                     | 0.783                                                                          | 0.950                                                                                          |
| R1 <sup>a</sup>                               | 0.0355                                                                         | 0.0137                                                                                         |
| wR2 <sup>b</sup>                              | 0.0932                                                                         | 0.0362                                                                                         |
| GOF <sup>c</sup>                              | 1.105                                                                          | 1.029                                                                                          |

$$^a R1 = \frac{\sum ||F_o| - |F_c||}{\sum |F_o|}$$

$$^b wR2 = [\sum \{w(F_o^2 - F_c^2)^2\} / \sum \{w(F_o^2)\}]^{1/2}$$

$$^c GOF = [\sum (w(F_o^2 - F_c^2)^2) / (M - N)]^{1/2}, \text{ where } M \text{ is the number of reflections and } N \text{ is the number of parameters refined.}$$

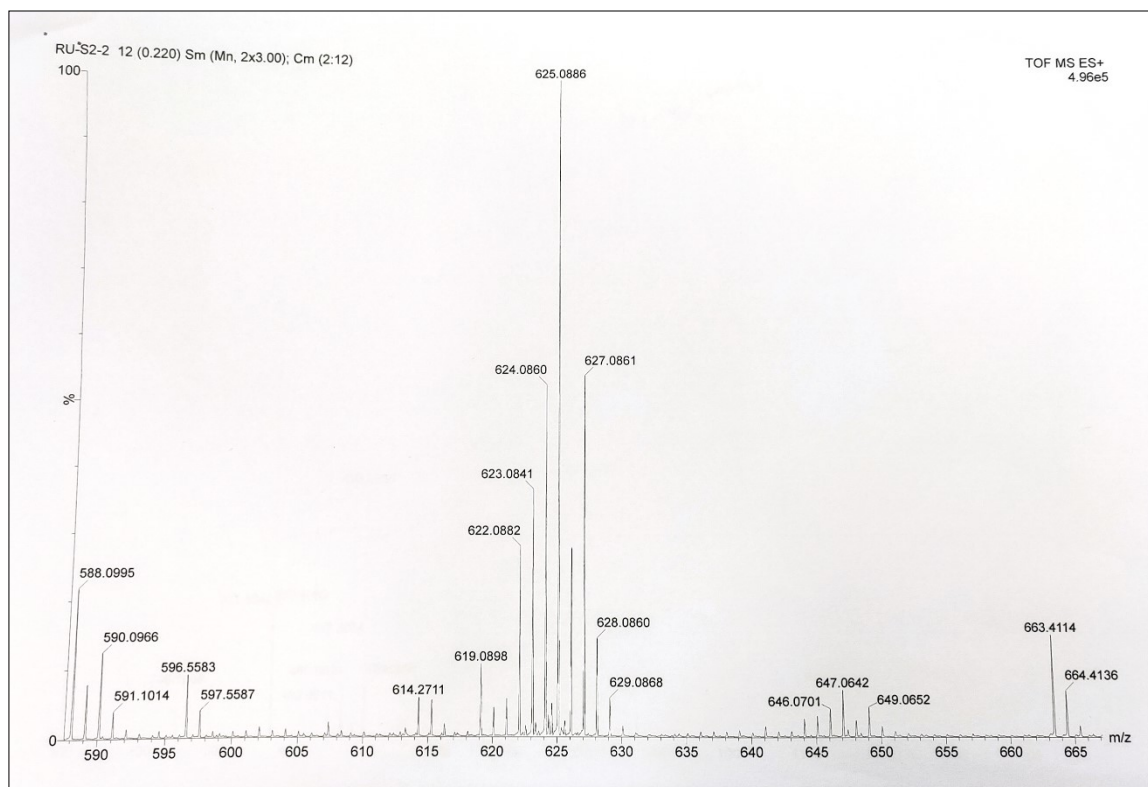

**Fig. S16.** Mass spectrum of  $[\text{Ru}(\text{L-CH}_3)_2(\text{dmsO})_2]$ .
